# Supplementary material for: Interplay between hydrophobicity and basicity toward the catalytic activity of isoreticular MOF organocatalysts
Source: Royal Society of Chemistry journal article supplement (doi:10.1039/c6nj00480f), 2016-01-01
Supplement: c6nj00480f1.pdf [file c6nj00480f1.pdf]

**Supplementary Information for:**  
**Interplay between hydrophobicity and basicity toward the catalytic activity of isorecticular organocatalyst MOFs**

Sedigheh Abedi, Alireza Azhdari Tehrani, Hosein Ghasempour and Ali Morsali,\*

Department of Chemistry, Faculty of Sciences, Tarbiat Modares University, P.O. Box 14115-175, Tehran, Iran

|                                                                                                                                                  |         |
|--------------------------------------------------------------------------------------------------------------------------------------------------|---------|
| <b>Figure S1.</b> FT-IR spectra of the ligands, L1 and RL1                                                                                       | Page 3  |
| <b>Figure S2.</b> FT-IR spectra of the ligands, L2 and RL2.                                                                                      | Page 4  |
| <b>Figure S3.</b> Mass spectra of the ligands, L2 and RL2.                                                                                       | Page 5  |
| <b>Figure S4.</b> Mass spectra of the ligands, L1 and RL1.                                                                                       | Page 6  |
| <b>Figure S5 .</b> (a) <sup>1</sup> H-NMR spectra of L1 and L2, (b) <sup>1</sup> H-NMR spectra of RL1 and RL2                                    | Page 7  |
| <b>Figure S6.</b> Comparative FT-IR spectra of TMU-6(L1) synthesized with different method and the recycled one after the condensation reaction. | Page 8  |
| <b>Figure S7.</b> Comparative FT-IR spectra of TMU-21(L2) synthesized with different method and the recycled one after the condensation reaction | Page 9  |
| <b>Figure S8.</b> Comparative FT-IR spectra of TMU-6(RL1) and the recycled one after the condensation reaction.                                  | Page 10 |
| <b>Figure S9.</b> Comparative FT-IR spectra of TMU-21(RL2) synthesized and the recycled one after the condensation reaction.                     | Page 11 |
| <b>Figure S10.</b> Thermogravimetric analysis of TMU-6(L1) (blue line) and TMU-21(L2) (red line)                                                 | Page 12 |
| <b>Figure S11.</b> Thermogravimetric analysis of TMU-6(RL1) (blue line) and TMU-21(RL2) (red line)                                               | Page 13 |
| <b>Figure S12.</b> PXRD patterns of TMU-6(L1), TMU-6(RL1), TMU-21(L2) and TMU-21(RL2) revealed that these four MOFs are isorecticular framework. | Page 14 |
| <b>Figure S13.</b> PXRD patterns of simulated, as-synthesized, mechano-synthesized, activated, after reaction and water stability of TMU-6(L1).  | Page 15 |
| <b>Figure S14.</b> PXRD patterns of simulated, as-synthesized, mechano-synthesized, activated, after reaction and water stability of TMU-21(L2). | Page 16 |

|                                                                                                                                                                                                                                                                                                                  |         |
|------------------------------------------------------------------------------------------------------------------------------------------------------------------------------------------------------------------------------------------------------------------------------------------------------------------|---------|
| <b>Figure S15.</b> PXRD patterns of simulated, mechano-synthesized, after reaction and water stability of TMU-6(L1) and TMU-6(RL1).                                                                                                                                                                              | Page 17 |
| <b>Figure S16.</b> PXRD patterns of simulated, mechano-synthesized, after reaction and water stability of TMU-21(L2) and TMU-21(RL2).                                                                                                                                                                            | Page 19 |
| <b>Table S1.</b> Catalytic performance of TMU-6(L1), TMU-6(RL1), TMU-21(L2) and TMU-21(RL2), obtained by mechanochemical synthesis, within aldol condensation of malonitrile with 2-cyclohexen-1-one, 24h.<br><b>Identification of the product:</b> 2-(cyclohex-2-enylidene)malononitrile                        | Page 20 |
| <b>Table S2.</b> Time in depended catalytic performance of TMU-6(L1), TMU-6(RL1), TMU-21(L2) and TMU-21(RL2), obtained by mechanochemical synthesis within aldol condensation of malonitrile with 2-cyclopenten-1-one.<br><b>Identification of the product:</b> 2-(cyclopent-2-enylidene)malononitrile           | Page 21 |
| <b>Table S3.</b> Time in depended catalytic performance of TMU-6(L1), TMU-6(RL1), TMU-21(L2) and TMU-21(RL2), obtained by mechanochemical synthesis, within aldol condensation of malonitrile with 4,4-dimethylcyclohexen-1-one.<br><b>Identification of the product:</b> 2-(cyclopent-2-enylidene)malononitrile | Page 22 |
| <b>Figure S17.</b> The images of the catalysts in H <sub>2</sub> O solvents after addition of toluene (up), in H <sub>2</sub> O solvents after addition of dichloromethane (down) (a) TMU-21(L2), (b) TMU-21(RL2), (c) TMU-6(L1) and (d) TMU-6(RL1).                                                             | Page 23 |
| <b>Figure S18.</b> Yield-versus-time profile of aldol-type condensation reaction of (a) 2-cyclopenten-1-one and (b) 4,4-dimethyl-2-cyclohexen-1-one catalyzed by four MOF structures in the reaction conditions indicated in Table 1 of the manuscript.                                                          | Page 24 |
| <b>Figure S19</b> Comparison of the catalyst reactivity of various substrates in the presence of different basic MOFs.                                                                                                                                                                                           | Page 25 |
| <b>Figure S20.</b> Reusability of TMU-6(RL1) (gray) and TMU-21(L2) (orange) in aldol-type condensation reaction of 2-cyclopenten-1-one and 4,4-dimethyl-2-cyclohexen-1-one, respectively. (Conditions: catalyst (10 mol%), malononitrile, MeOH, 60 °C, 24h).                                                     | Page 25 |

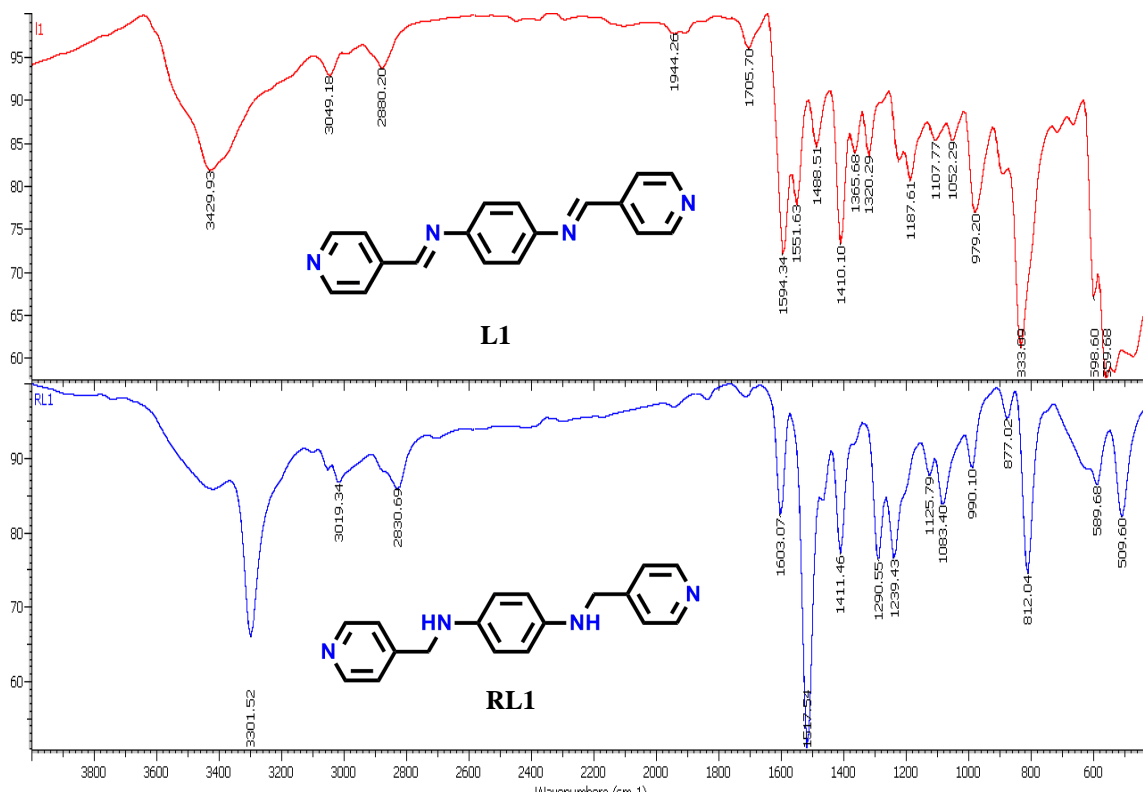

**Figure S1.** FT-IR spectra of the ligands, L1 and RL1.

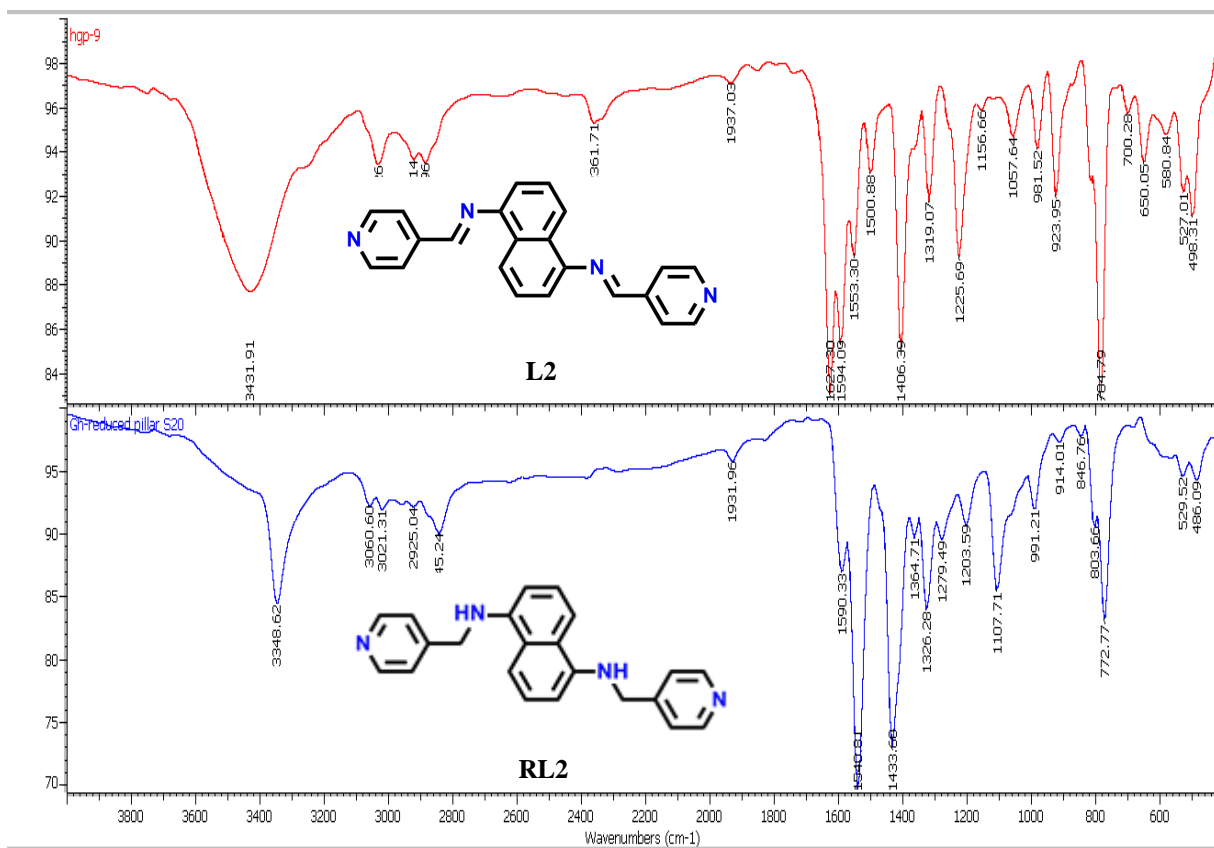

Figure S2. FT-IR spectra of the ligands, L2 and RL2.

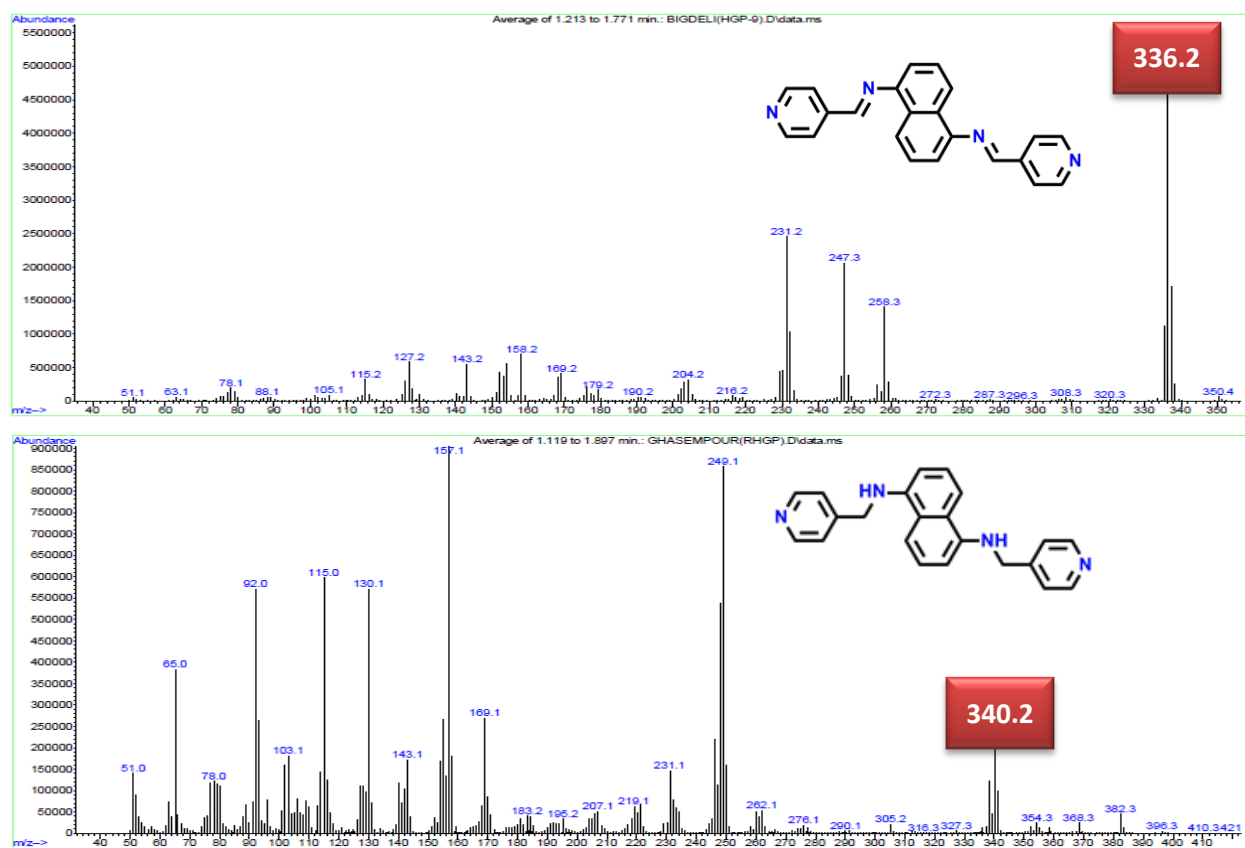

Figure S3. Mass spectra of the ligands, L2 and RL2.

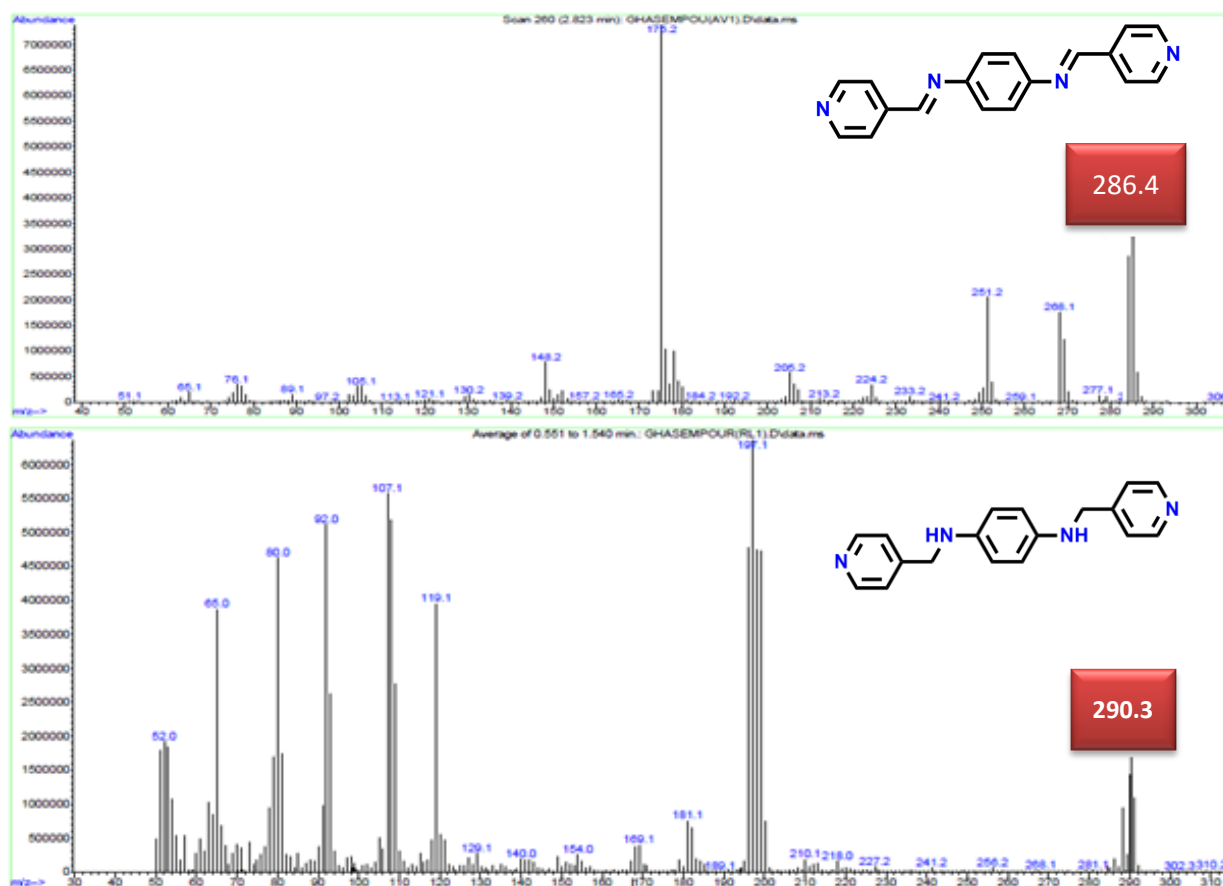

**Figure S4.** Mass spectra of the ligands, L1 and RL1.

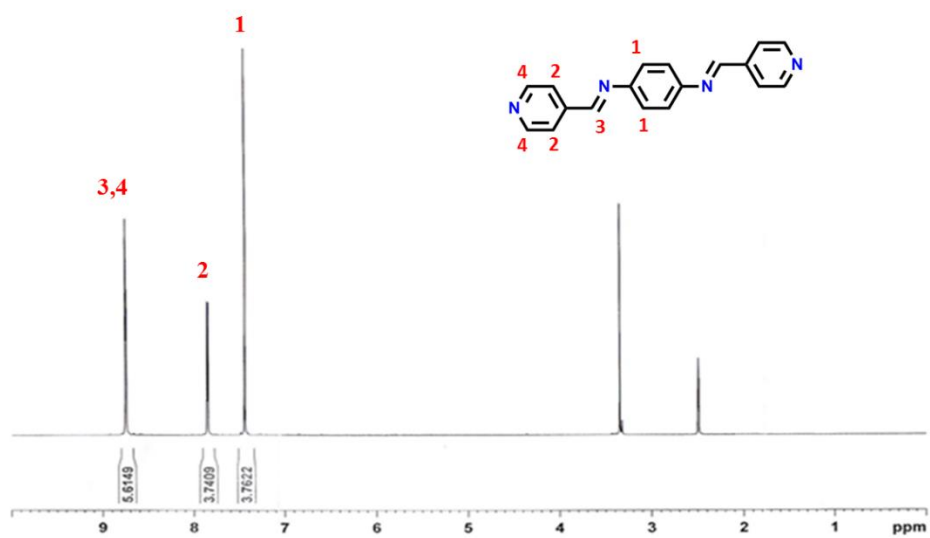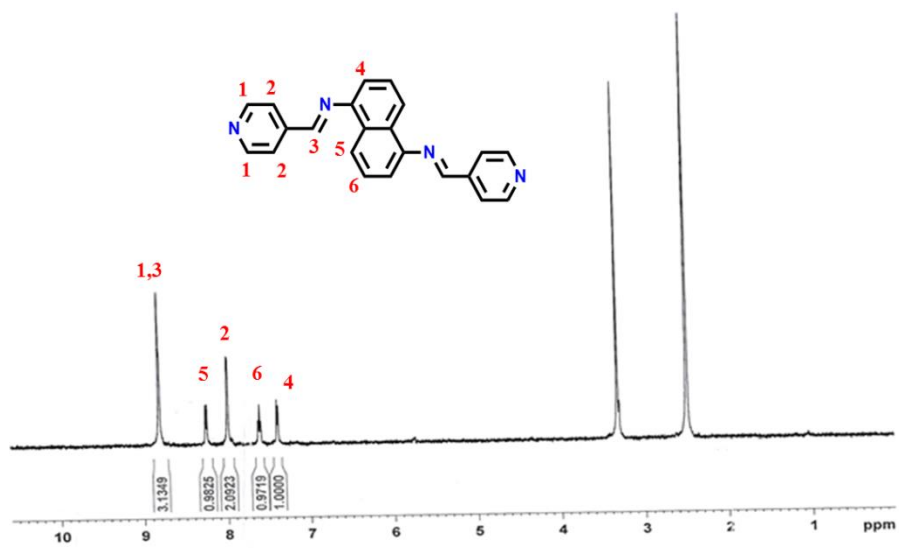

Figure S5 (a). <sup>1</sup>H-NMR spectra of L1 and L2

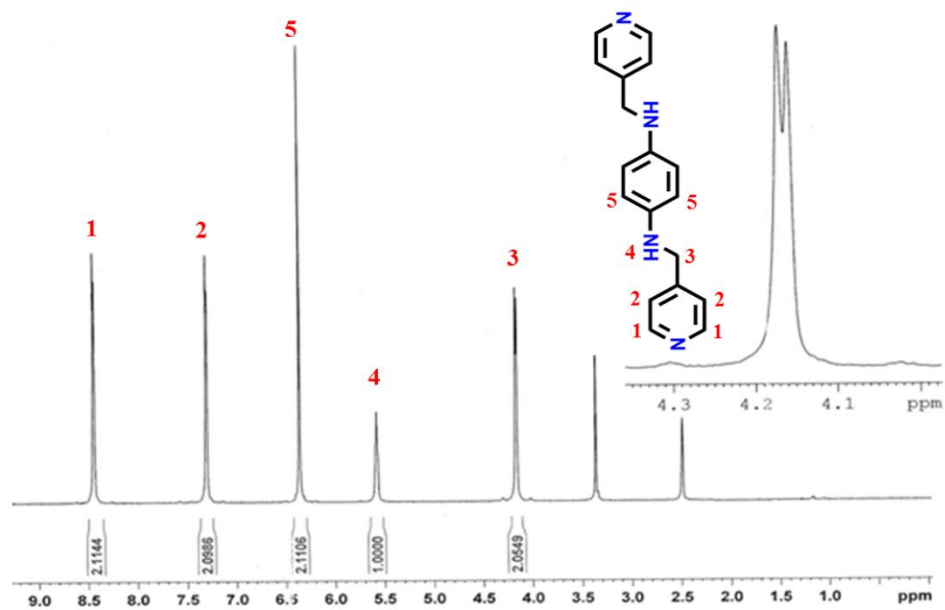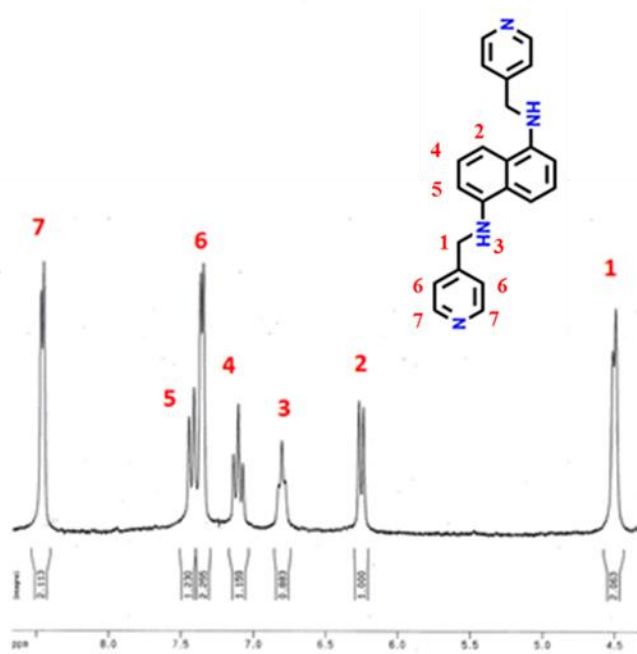

Figure S5 (b). <sup>1</sup>H-NMR spectra of RL1 and RL2.



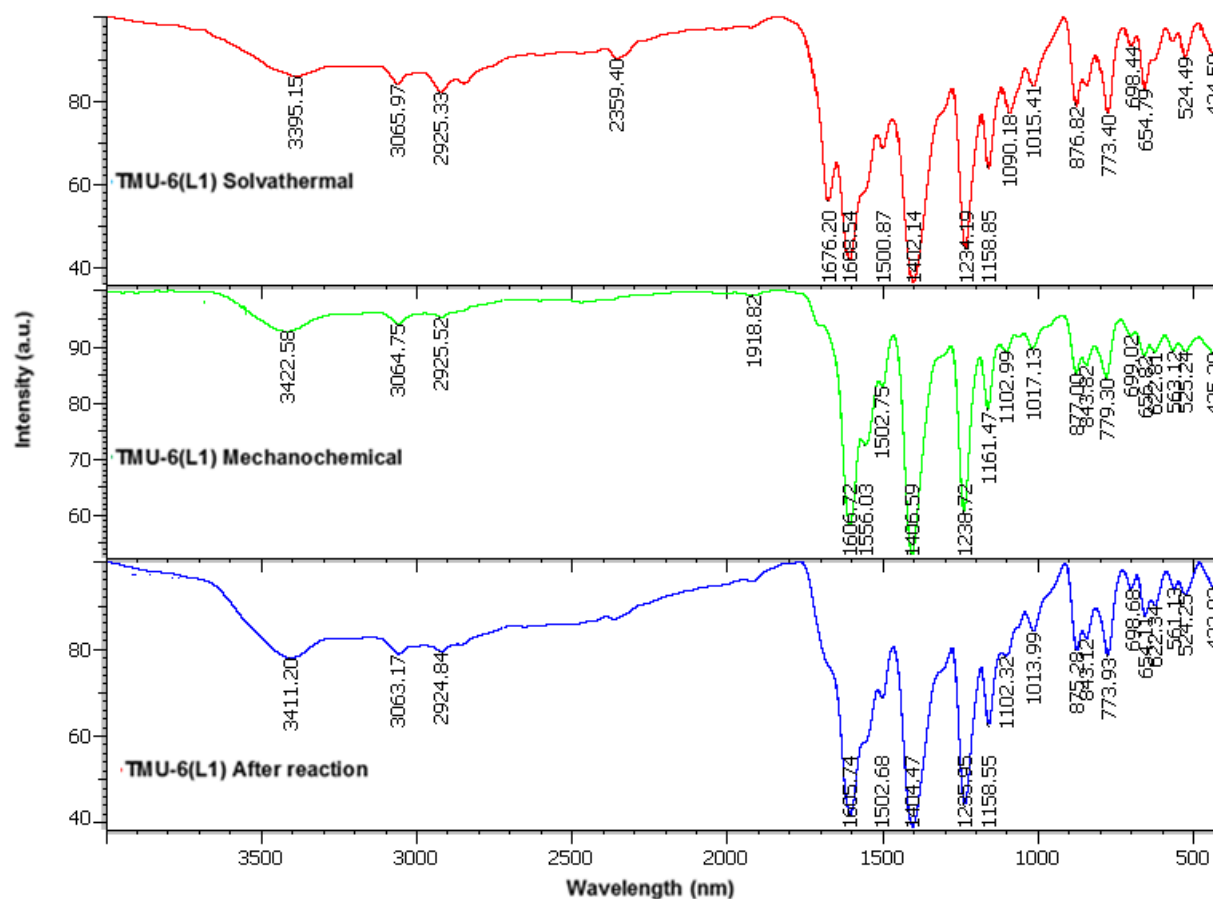

**Figure S6.** Comparative FT-IR spectra of TMU-6(L1) synthesized with different method and the recycled one after the condensation reaction.

The FT-IR spectrum of the MOFs shows the same characteristic bands of the dicarboxylate groups of the H<sub>2</sub>oba ligands at ca. 1606 and 1404 cm<sup>-1</sup> for the asymmetric and symmetric vibrations, respectively, which indicate coordination of carboxylate ligands to metal ions. The absence of the expected characteristic bands at 1730–1690 cm<sup>-1</sup> for the protonated carboxylate groups indicates the complete deprotonation of H<sub>2</sub>oba ligand in the reaction with Zn ions. This point exists in FT-IR spectrum of all prepared MOFs.

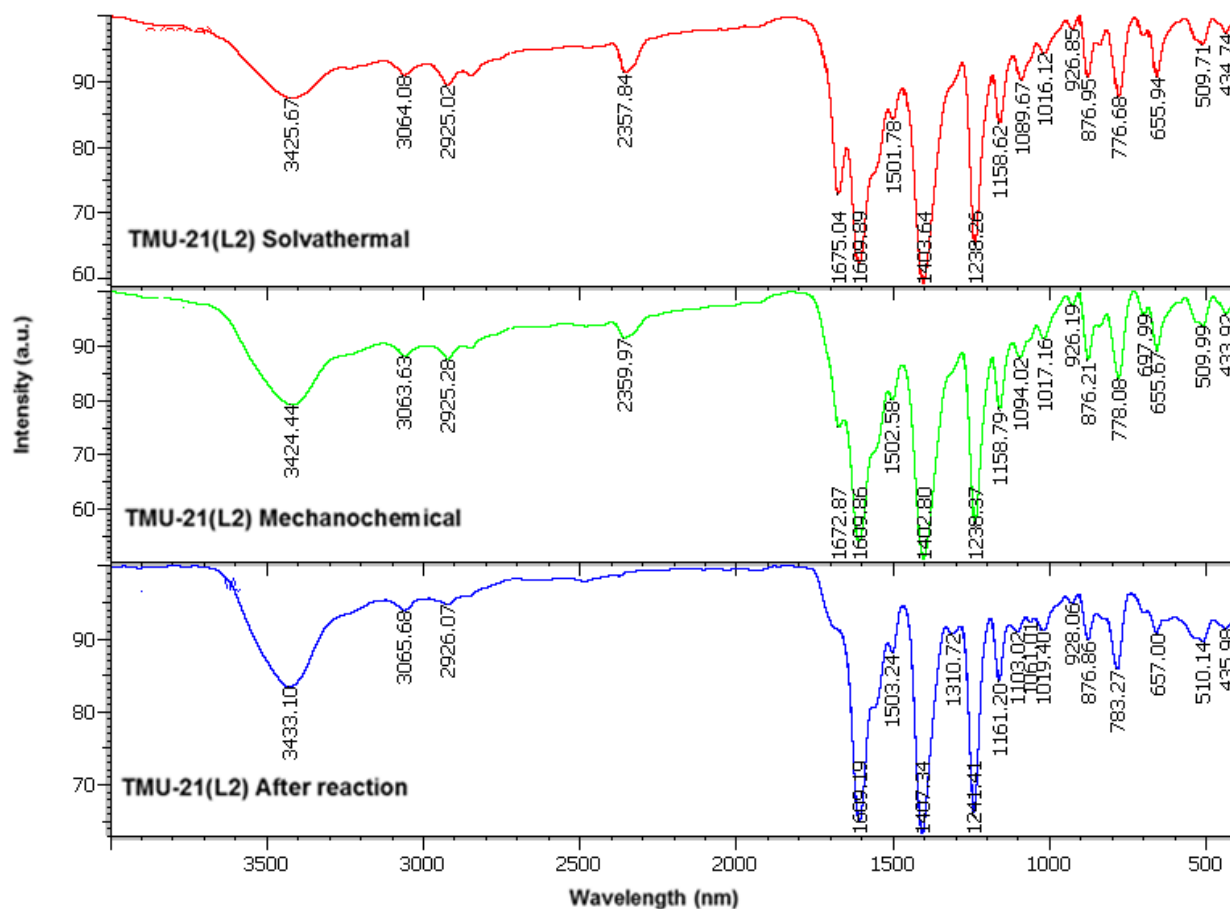

**Figure S7.** Comparative FT-IR spectra of TMU-21(L2) synthesized with different method and the recycled one after the condensation reaction.

The FT-IR spectrum of the MOFs shows the same characteristic bands of the dicarboxylate groups of the H<sub>2</sub>oba ligands at ca. 1609 and 1402 cm<sup>-1</sup> for the asymmetric and symmetric vibrations, respectively, which indicate coordination of carboxylate ligands to metal ions.

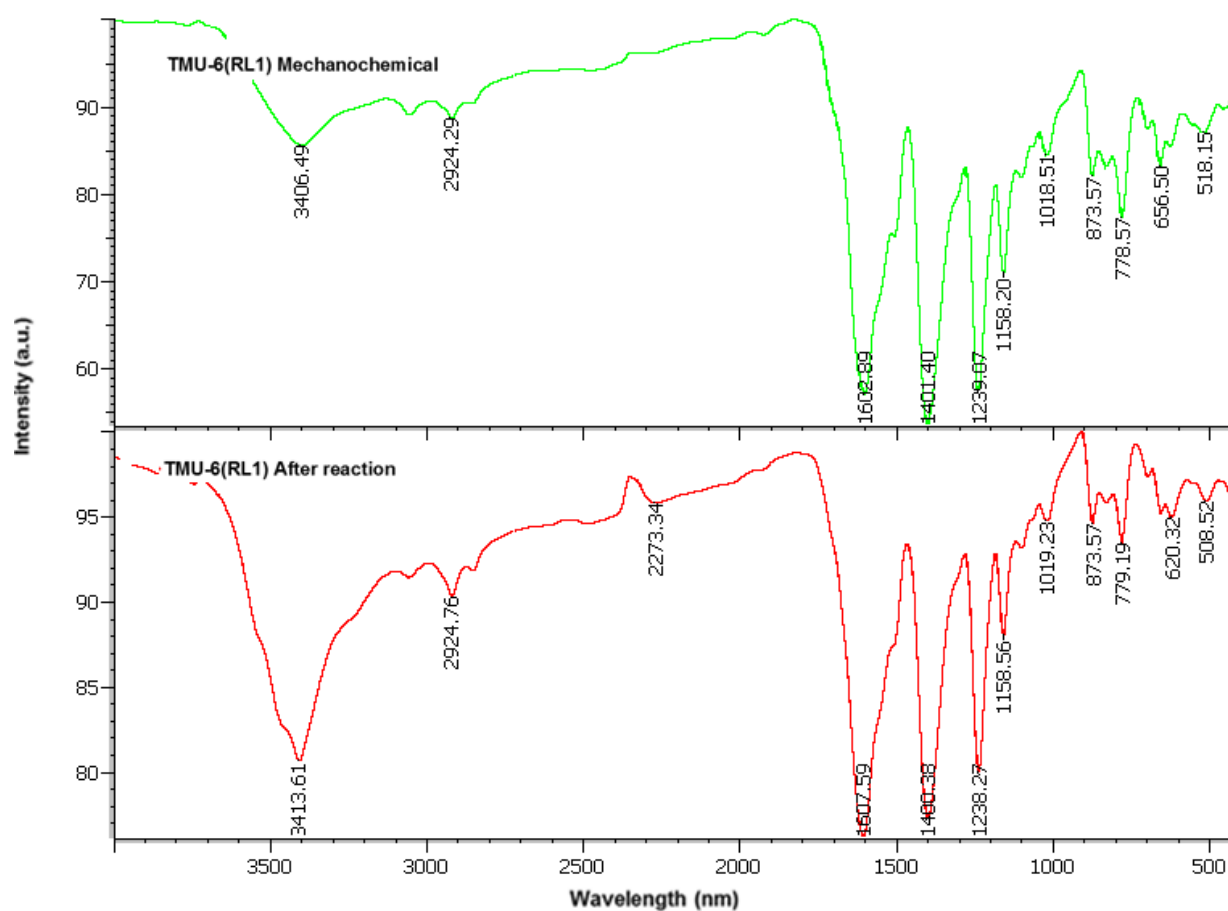

**Figure S8.** Comparative FT-IR spectra of TMU-6(RL1) and the recycled one after the condensation reaction.

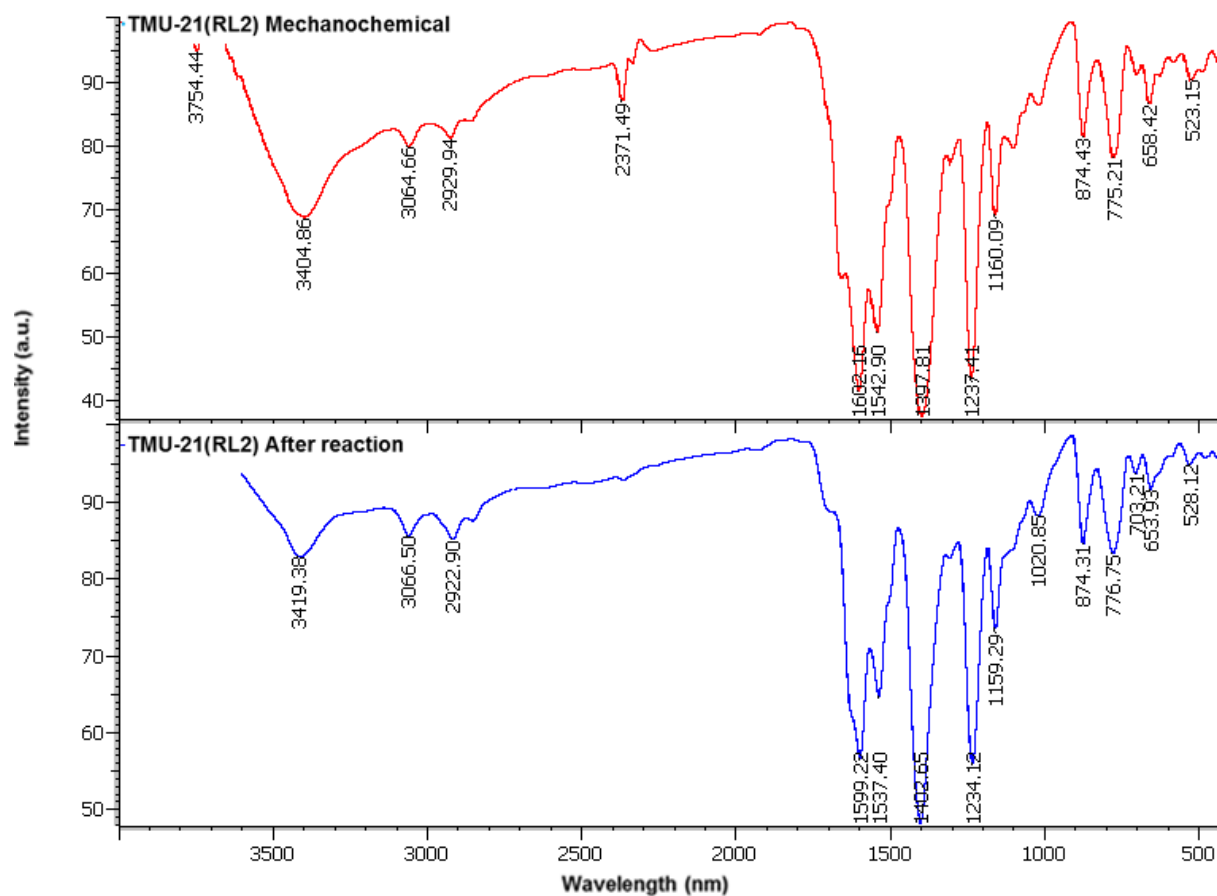

**Figure S9.** Comparative FT-IR spectra of TMU-21(RL2) synthesized and the recycled one after the condensation reaction.

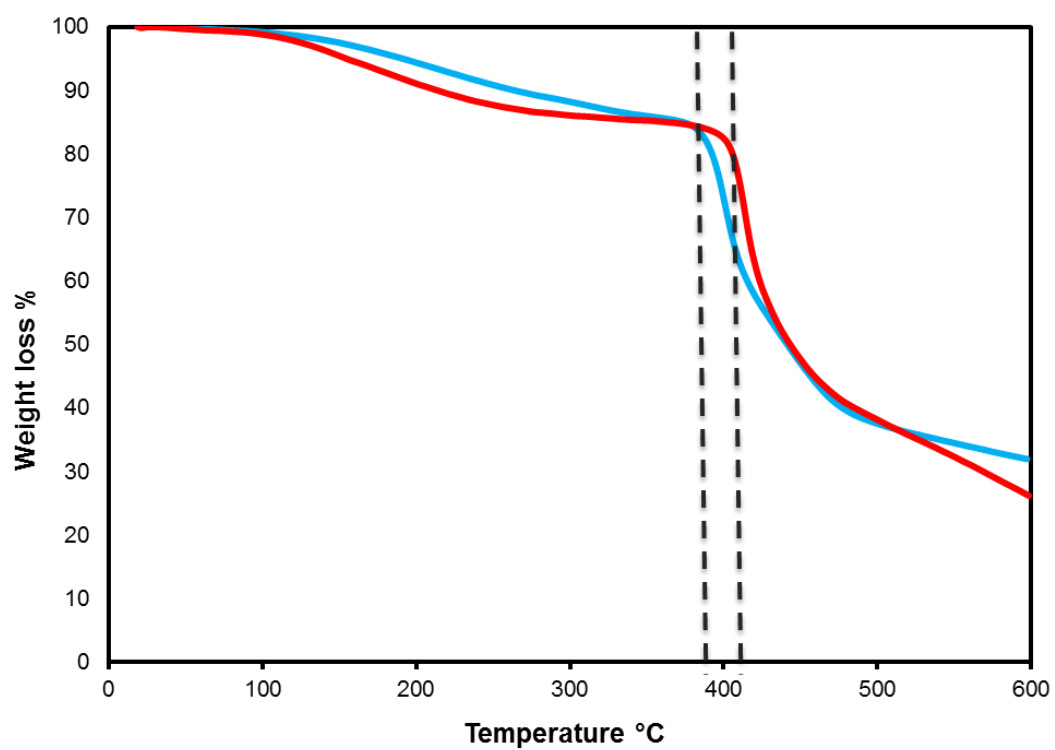

**Figure S10.** Thermogravimetric analysis of TMU-6(L1) (blue line) and TMU-21(L2) (red line)

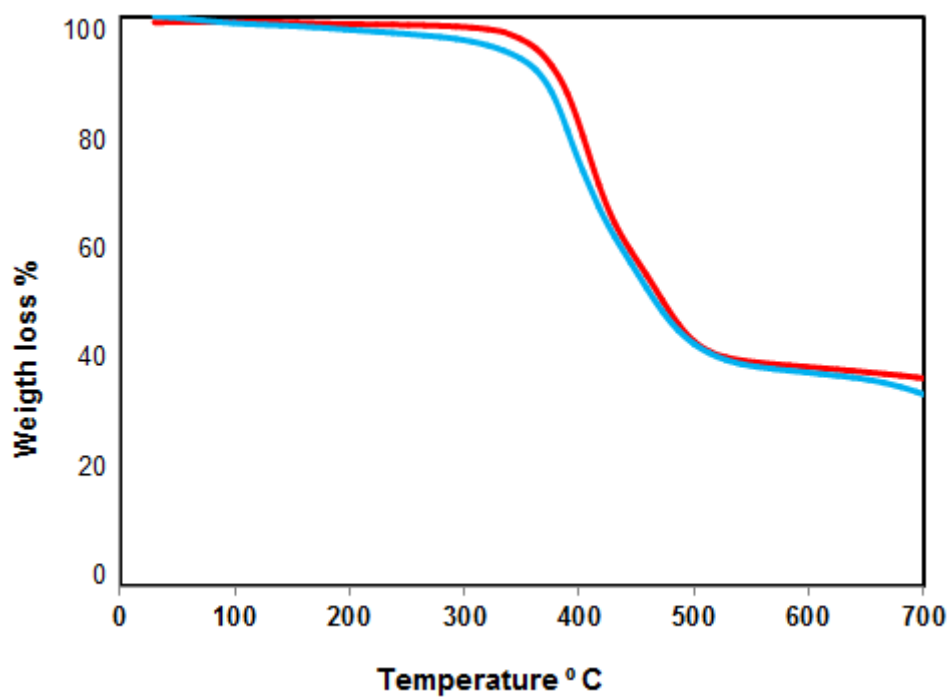

**Figure S11.** Thermogravimetric analysis of TMU-6(RL1) (blue line) and TMU-21(RL2) (red line)

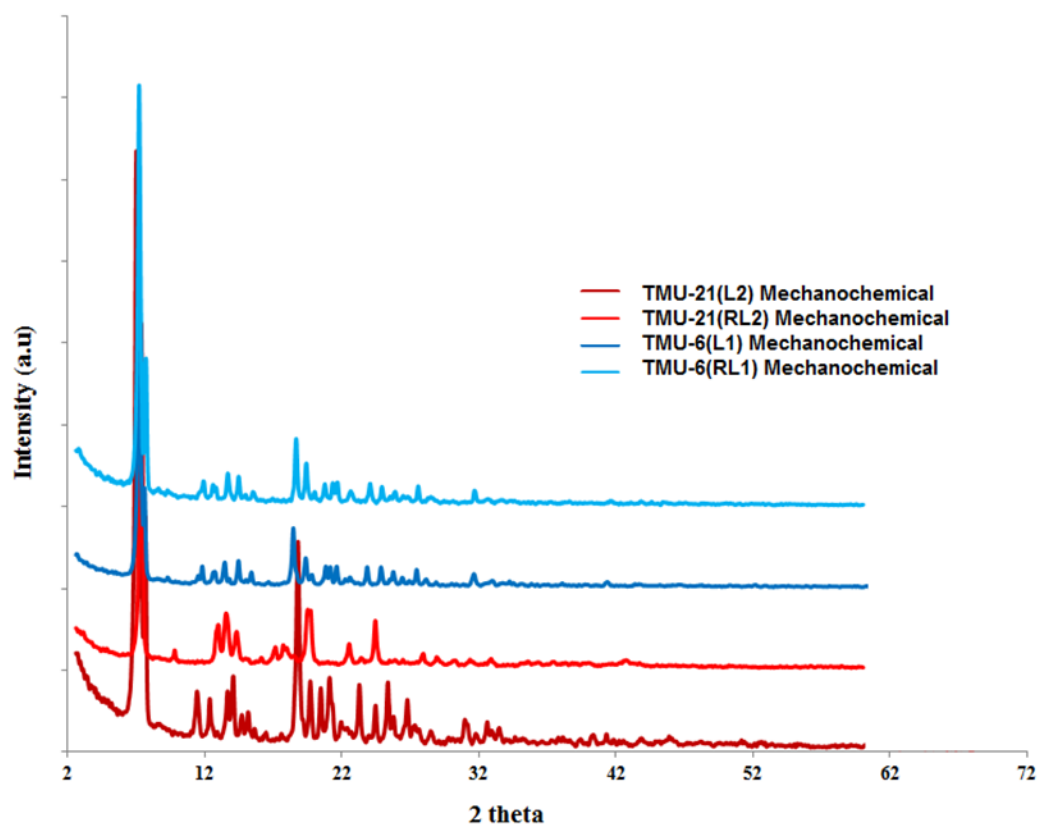

**Figure S12.** PXRD patterns of TMU-6(L1), TMU-6(RL1), TMU-21(L2) and TMU-21(RL2) revealed that these four MOFs are isorecticular framework.

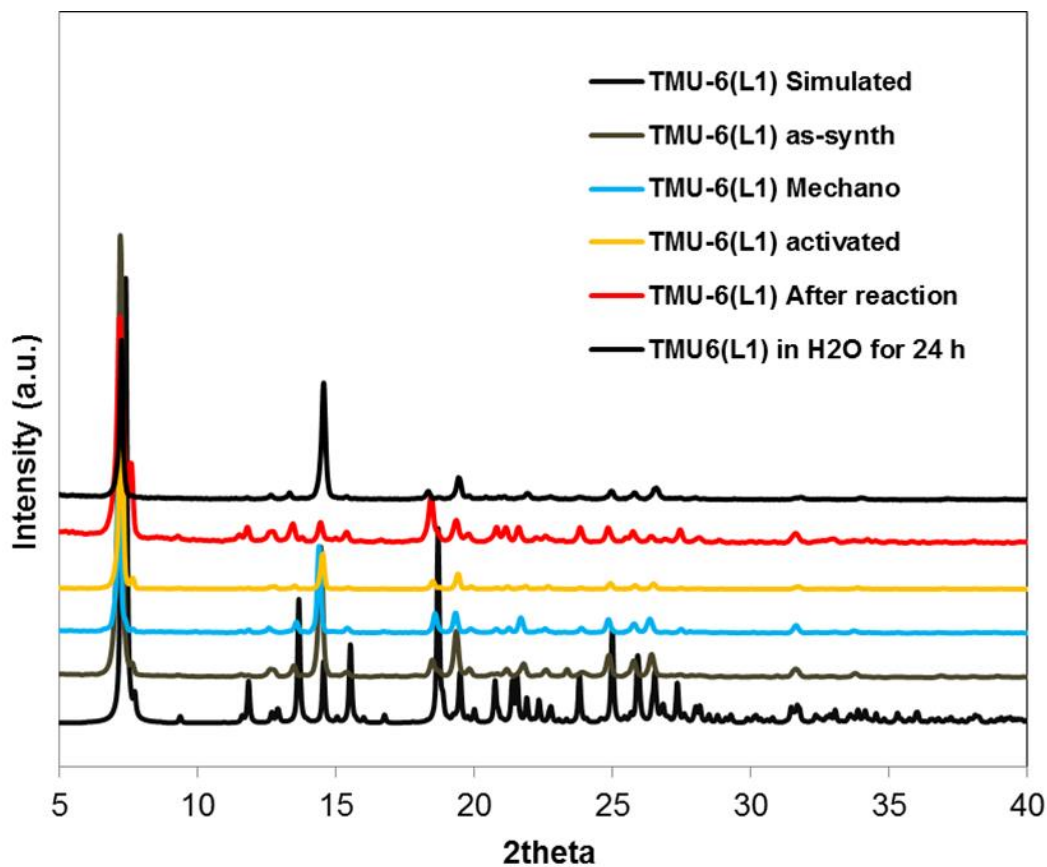

**Figure S13.** PXRD patterns of simulated, as-synthesized, mechano-synthesized, activated, after reaction and water stability of TMU-6(L1). The recycling PXRD of the MOFs were recorded after 7<sup>th</sup> cycle of reusability test.



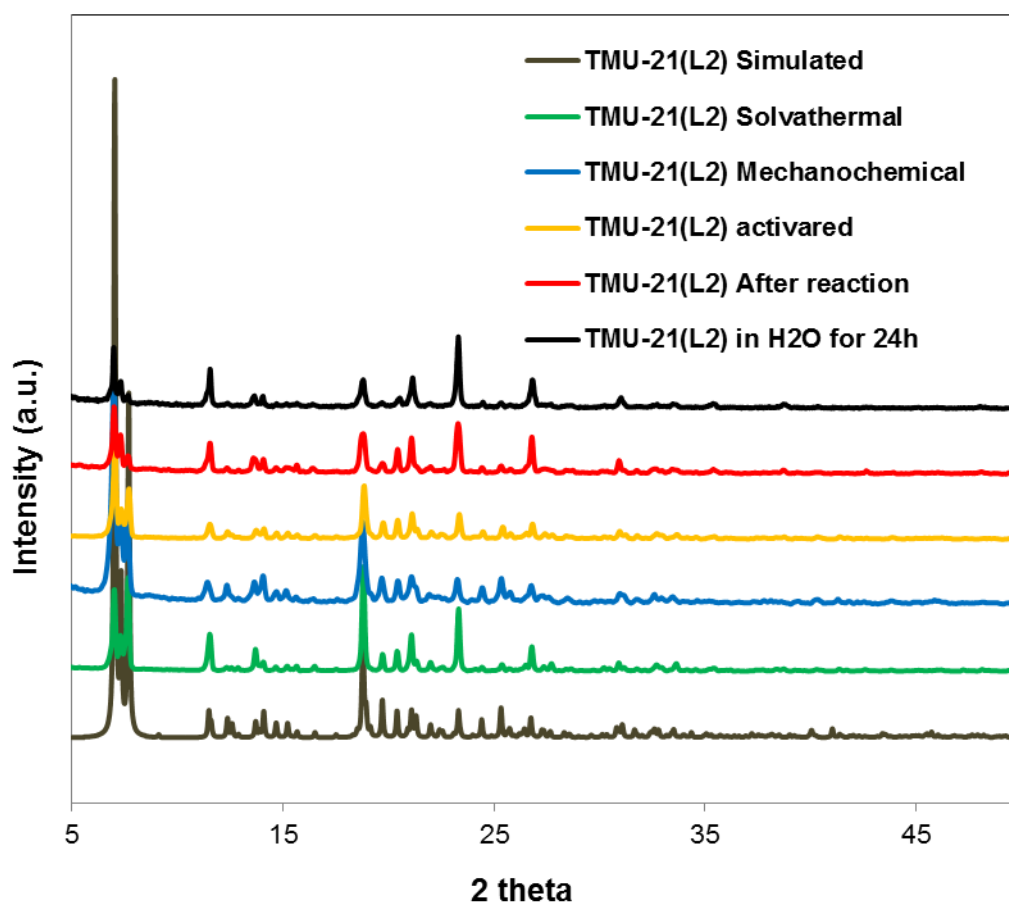

**Figure S14.** PXRD patterns of simulated, as-synthesized, mechano-synthesized, activated, after reaction and water stability of TMU-21(L2). The recycling PXRD of the MOFs were recorded after 7<sup>th</sup> cycle of reusability test.

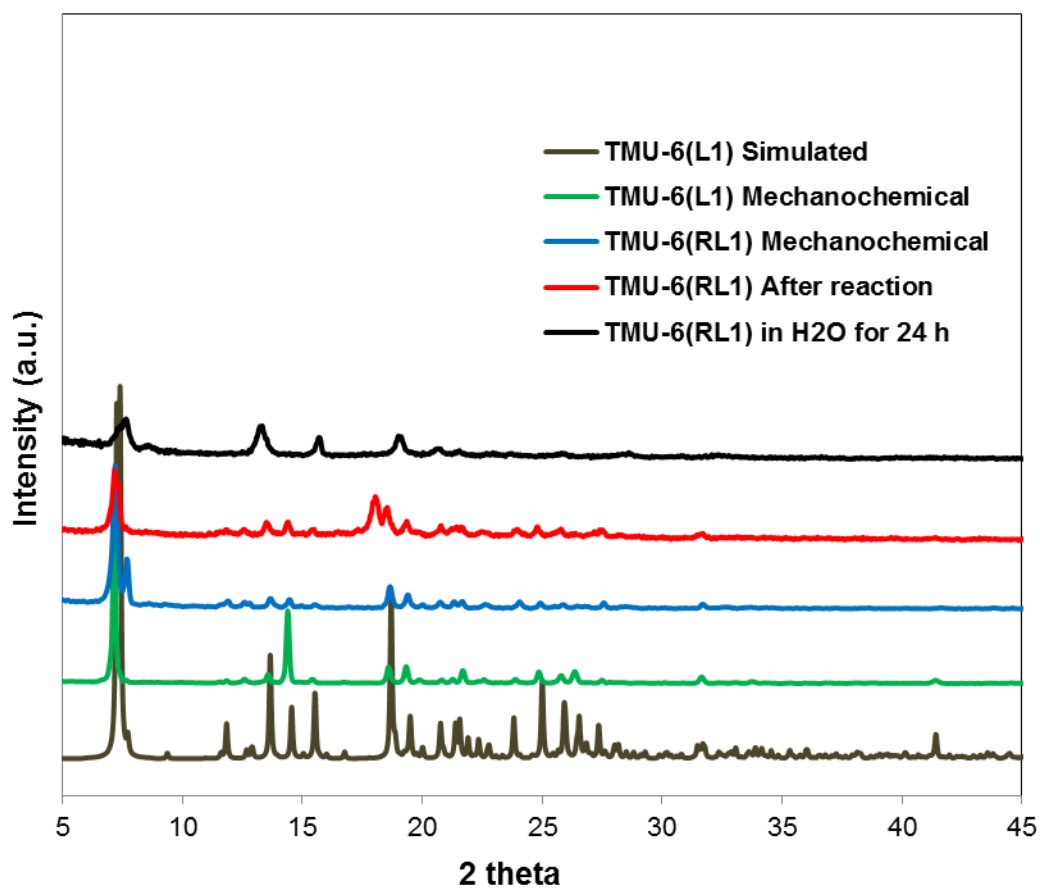

**Figure S15.** PXRD patterns of simulated, mechano-synthesized, after reaction and water stability of TMU-6(L1) and TMU-6(RL1). The recycling PXRD of the MOFs were recorded after 7<sup>th</sup> cycle of reusability test.

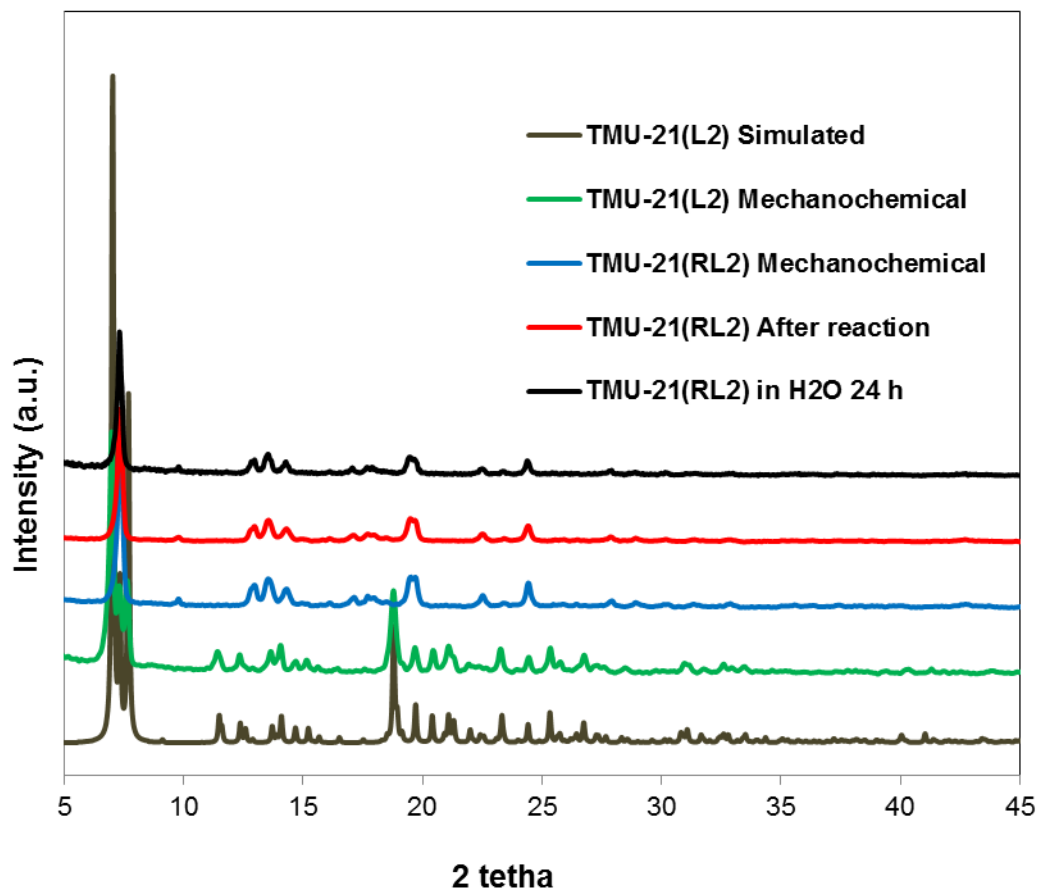

**Figure S16.** PXRD patterns of simulated, mechano-synthesized, after reaction and water stability of TMU-21(L2) and TMU-21(RL2). The recycling PXRD of the MOFs were recorded after 7<sup>th</sup> cycle of reusability test.

| Time         | TMU-21(L2) | TMU-6(L1) | TMU-6(RL1) | TMU-21(RL2) | control |
|--------------|------------|-----------|------------|-------------|---------|
| MeOH<br>R.T. | 30         | 16.5      | 11         | 7.6         | 0.0     |
| MeOH<br>60°C | 60.5       | 45        | 40         | 36          | 0.0     |
| EtOH<br>60°C | 19.4       | 13        | 13.2       | 10          | 0.0     |

**Table S1.** Catalytic performance of TMU-6(L1), TMU-6(RL1), TMU-21(L2) and TMU-21(RL2), obtained by mechanochemical synthesis, within aldol condensation of malonitrile with 2-cyclohexen-1-one, 24h.

**Identification of the product:** 2-(cyclohex-2-enylidene)malononitrile

FT-IR data (KBr pellet,  $\nu/\text{cm}^{-1}$ ): 436(m), 570(m), 806(w), 1024(m), 1095(m), 1260(w), 1443(w), 1637(s), 2203(s), 2925(s), 3432(m)

$^1\text{H}$  NMR (500 MHz,  $\text{CDCl}_3$ ): 1.86 (m, 2H), 2.44 (m, 2H), 2.55 (t, 2H), 6.13 (m, 1H), 6.70 (d, 1H)

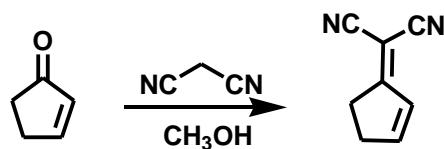

| Time | TMU-6(RL1) | TMU-6(L1) | TMU-21(L2) | TMU-21(RL2) |
|------|------------|-----------|------------|-------------|
| 12 h | 54         | 47.8      | 40.2       | 25          |
| 24 h | 93.7       | 89        | 76.3       | 60          |
| 36 h | 97.3       | 99.2      | 93         | 80          |
| 60 h | ---        | ---       | 99.5       | 95.4        |

**Table S2.** Time in depended catalytic performance of TMU-6(L1), TMU-6(RL1), TMU-21(L2) and TMU-21(RL2), obtained by mechanochemical synthesis within aldol condensation of malonitrile with 2-cyclopenten-1-one.

**Identification of the product:** 2-(cyclopent-2-enylidene)malonitrile

FT-IR data (KBr pellet,  $\text{v}/\text{cm}^{-1}$ ): 566(m), 1097(m), 1304(m), 1439(m), 1577(s), 1642(vs), 2204(vs), 2948(m), 3234(m), 3350(m)

$^1\text{H}$  NMR (500 MHz,  $\text{CDCl}_3$ ): 1.61 (m, 2H), 2.06 (t, 2H), 5.09 (m, 1H), 5.82 (d, 1H)

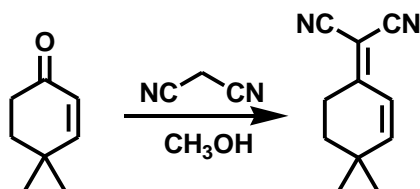

| Time | TMU-21(L2) | TMU-6(L1) | TMU-6(RL1) | TMU-21(RL2) |
|------|------------|-----------|------------|-------------|
| 12 h | 53.5       | 42.8      | 38.5       | 27.6        |
| 24 h | 72.7       | 53.4      | 48         | 31.3        |
| 36 h | 87         | 72.4      | 69         | 63          |
| 60 h | 91.4       | 80.8      | 77.8       | 70.3        |

**Table S3.** Time in depended catalytic performance of TMU-6(L1), TMU-6(RL1), TMU-21(L2) and TMU-21(RL2), obtained by mechanochemical synthesis, within aldol condensation of malonitrile with 4,4-dimethylcyclohexen-1-one.

**Identification of the product:** 2-(4,4-dimethylcyclohex-2-enylidene)malonitrile

FT-IR data (KBr pellet,  $\text{v}/\text{cm}^{-1}$ ): 682(m), 1022(m), 1219(m), 1456(m), 1553(m), 1605(s), 2192(s), 2959(m), 3209(m), 3347(m)

$^1\text{H}$  NMR (500 MHz,  $\text{CDCl}_3$ ): 1.14 (s, 6H), 1.71 (t, 2H), 2.83 (t, 2H), 6.45 (d, 1H), 6.62 (d, 1H)

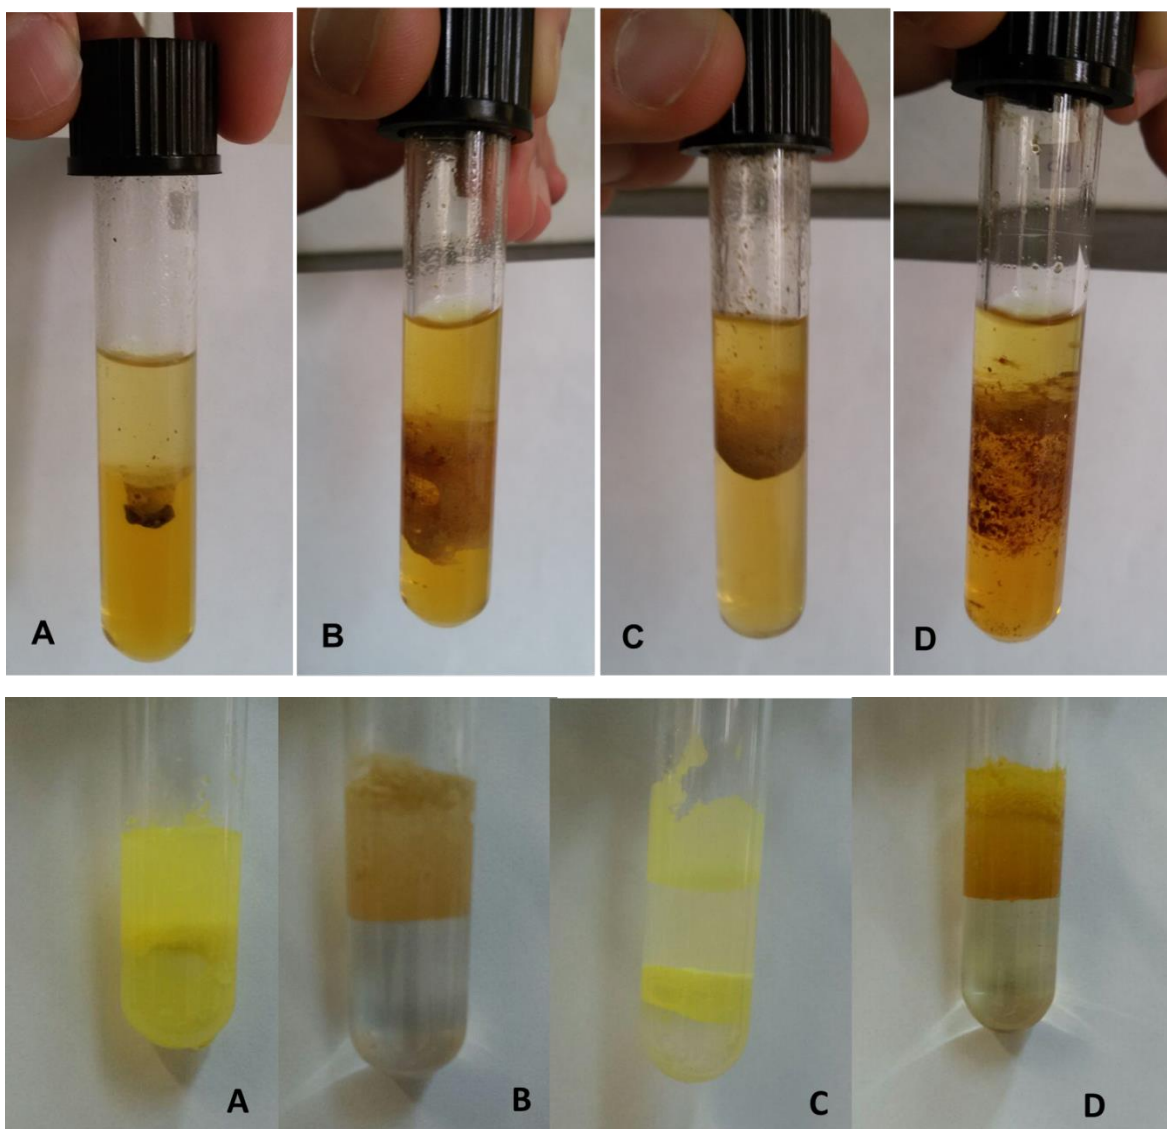

**Figure S17.** The images of the catalysts in H<sub>2</sub>O solvents after addition of toluene (up), in H<sub>2</sub>O solvents after addition of dichloromethane (down) (a) TMU-21(L2), (b) TMU-21(RL2), (c) TMU-6(L1) and (d) TMU-6(RL1).

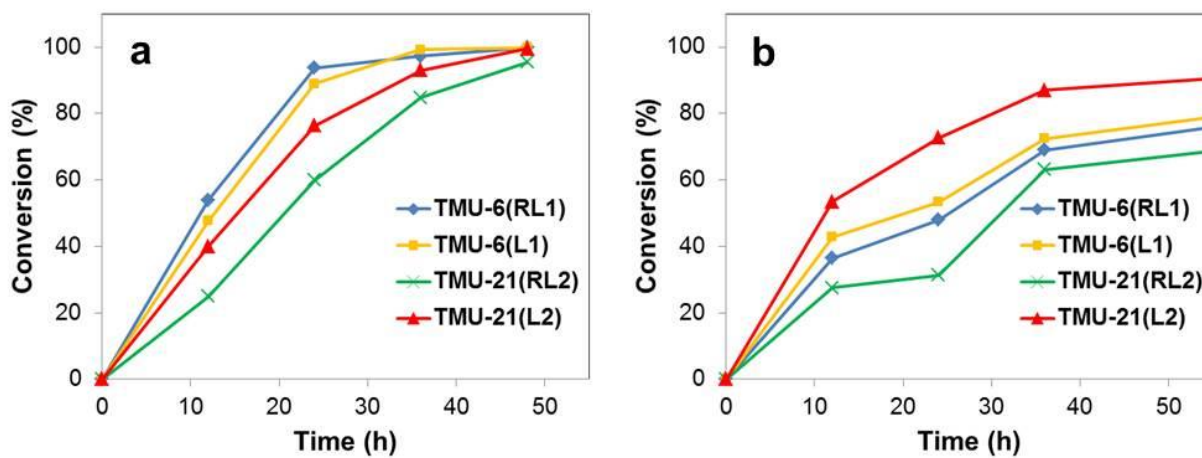

**Figure S18.** Yield-versus-time profile of aldol-type condensation reaction of (a) 2-cyclopenten-1-one and (b) 4,4-dimethyl-2-cyclohexen-1-one catalyzed by four MOF structures in the reaction conditions indicated in Table 1 of the manuscript.



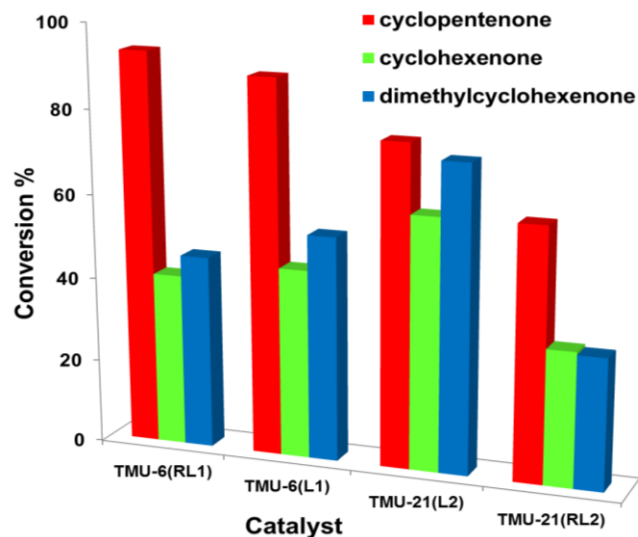

**Figure S19** Comparison of the catalyst reactivity of various substrates in the presence of different basic MOFs.

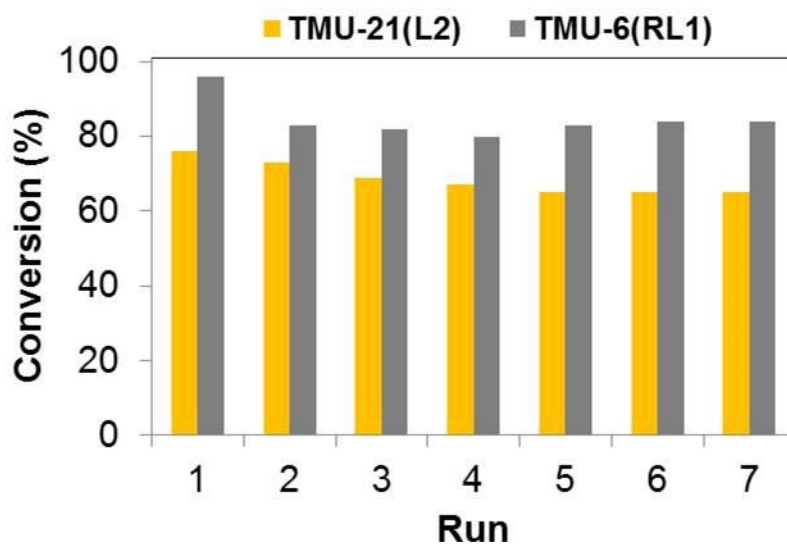

**Figure S20.** Reusability of TMU-6(RL1) (gray) and TMU-21(L2) (orange) in aldol-type condensation reaction of 2-cyclopenten-1-one and 4,4-dimethyl-2-cyclohexen-1-one (0.6 mmol), respectively. (Conditions: catalyst (5 mol%), malononitrile (0.9 mmol), MeOH, 60 °C, 24h)
